# Supplementary material for: Dwarf open reading frame (DWORF) is a direct activator of the sarcoplasmic reticulum calcium pump SERCA
Source: eLife journal article supplement (doi:10.7554/elife.65545), 2021-06-02
Supplement: supp [file elife-65545-supp-v1.zip]

Archive with 2 entries (2 files):
- elife_poa_e65545_Figure_4_figure_supplement_1.pdf
- elife_poa_e65545_Transparent_Reporting_File.pdf
