# Supplementary material for: Dwarf open reading frame (DWORF) is a direct activator of the sarcoplasmic reticulum calcium pump SERCA
Source: eLife journal article supplement (doi:10.7554/elife.65545), 2021-06-02
Supplement: supp [file elife-65545-supp-v1.zip]

**Control**

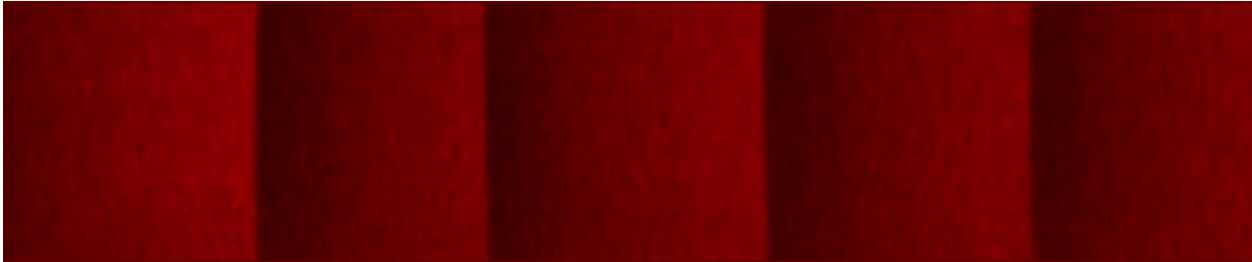

**DWORF**

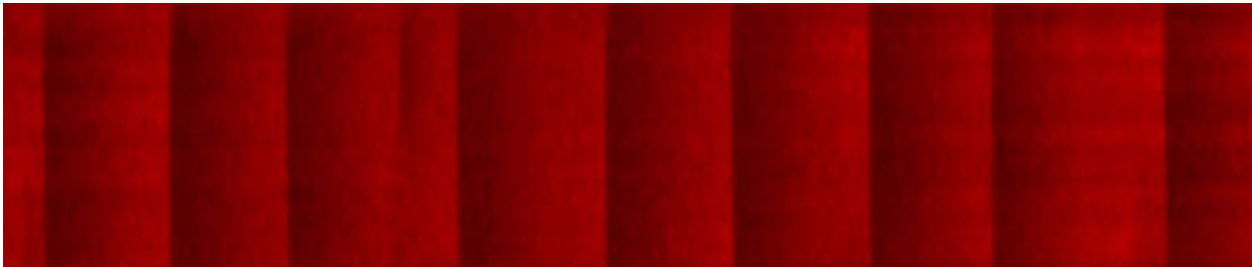

**PLN**

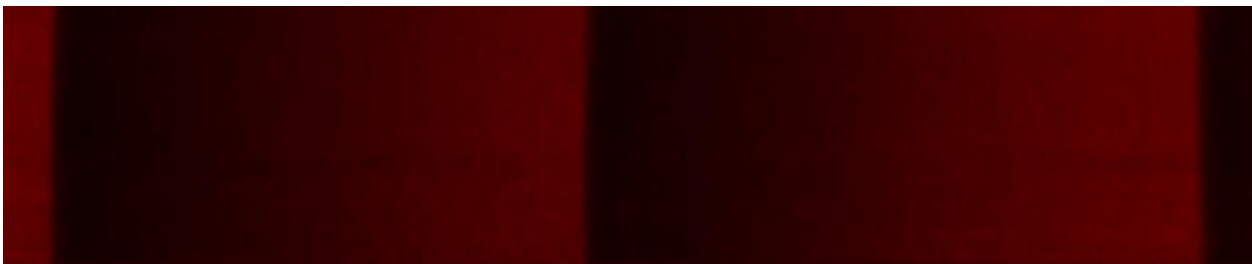

**10  $\mu$ m**

**5 s**

**Figure 4 – Figure Supplement 1:** Examples of the experimental protocol used to measure SERCA-mediated endoplasmic reticulum (ER)  $\text{Ca}^{2+}$  uptake. Representative line-scan images of R-CEPIA1er during an initial 45 second recording are shown. Line-scan images of R-CEPIA1er were calibrated with ionomycin (see Materials & Methods) to generate profiles of changes in ER  $\text{Ca}^{2+}$  concentration ( $[\text{Ca}^{2+}]_{\text{ER}}$ ) as shown in Figure 4A. Experimental details can be found in Bovo et al., Am J Physiol Heart Circ Physiol (2019) 316:H1323-H1331.
